# Supplementary material for: The Alpha-2A Adrenergic Receptor Gene -1291C/G Single Nucleotide Polymorphism is Associated with the Efficacy of Methylphenidate in Treating Taiwanese Children and Adolescents with Attention-Deficit Hyperactivity Disorder
Source: PubMed Central journal article supplement — Psychiatry Investig. 2018 Feb 28;15(3):306–12. doi: 10.30773/pi.2017.07.24 (PMC5900374; doi:10.30773/pi.2017.07.24), 2018-02-28
Supplement: pi-2017-07-24-suppl.pdf [file pi-2017-07-24-suppl.pdf]

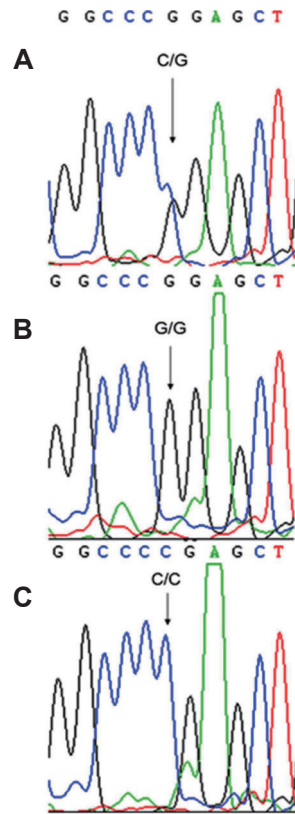

**Supplementary Figure 1.** Representative results of DNA sequencing. The schematic diagrams of A, B, and C show the examples of nucleotides (-1291) in the ADRA2A gene read by the DNA sequencer for CG heterozygotes, GG homozygotes and CC homozygotes, respectively. DNA: deoxyribonucleic acid, ADRA2A: alpha-2A adrenergic receptor.
